# Supplementary material for: Time-Restricted Feeding Improves Body Weight Gain, Lipid Profile, and Atherogenic Indices in Cafeteria Diet-fed Rats: Role of Browning Inguinal White Adipose Tissue
Source: Preprints.org preprint supplement (doi:10.20944/preprints202006.0134.v1), 2020-06-11
Supplement: Supplementary file 2 [file supplementary]

**Table S1.** Normal chow and cafeteria food items compositions as given by the product manufacturers.

| **Values are Per 1g of Food Item** | Total (kcal) | Total Fat  (g) | Saturated Fat (g) | Cholesterol (mg) | Protein (g) | Total Carb (g) | Sugars (g) | Dietary Fiber  (g) | Sodium (mg) |
| --- | --- | --- | --- | --- | --- | --- | --- | --- | --- |
| Normal chow | 3.10 | 0.06 | 0.00 | 0.00 | 0.19 | 0.44 | 0.04 | 0.03 |  |
| Cereals Lion Caramel Chocolat (Nestle) | 4.06 | 0.07 | 0.03 | 0.00 | 0.08 | 0.76 | 0.29 | 0.05 | 2.00 |
| Nesquick Cereals (Nestle) | 3.96 | 0.02 | 0.01 | 0.00 | 0.08 | 0.76 | 0.25 | 0.09 | 4.40 |
| Chocolate Chip Cookies (Bimo) | 5.40 | 0.25 | 0.12 | 0.00 | 0.06 | 0.61 | 0.31 | 0.02 | 2.97 |
| Cream Filled cookies (Dream) | 4.92 | 0.24 | 0.14 | 0.00 | 0.05 | 0.65 | 0.27 | 0.03 | 1.46 |
| Bar Peanuts Chocolat (Maxon) | 5.65 | 0.37 | 0.14 | 0.15 | 0.05 | 0.55 | 0.40 | 0.00 | 1.32 |
| Chocolat Filled with Caramel Cream (Bimo) | 4.73 | 0.22 | 0.14 | 0.00 | 0.08 | 0.62 | 0.53 | 0.01 | 2.00 |
| Mallow Pie (Alpella) | 4.48 | 0.18 | 0.11 | 0.00 | 0.05 | 0.67 | 0.45 | 0.03 | 2.61 |
| Mini Muffin (Dulcesol) | 4.72 | 0.28 | 0.03 | 0.76 | 0.05 | 0.50 | 0.35 | 0.01 | 2.90 |
| Snack’ Choc Caramel (Alpella) | 4.56 | 0.17 | 0.13 | 0.00 | 0.04 | 0.71 | 0.60 | 0.01 | 1.67 |
| Truffle Snack (Dulcesol) | 5.31 | 0.26 | 0.13 | 0.00 | 0.04 | 0.63 | 0.44 | 0.02 | 1.00 |
| Crackers Cheese Flavored (Tuc) | 4.85 | 0.23 | 0.10 | 0.06 | 0.08 | 0.61 | 0.05 | 0.02 | 10.60 |
| Peanuts Corn Chips (Mr. Chips) | 5.00 | 0.26 | 0.04 | 0.00 | 0.13 | 0.56 | 0.02 | 0.04 | 7.56 |
| Potato Crisps (Mister) | 5.10 | 0.29 | 0.15 | 0.00 | 0.06 | 0.54 | 0.03 | 0.05 | 7.81 |
| Cream Filled Wafers (Bimo) | 5.24 | 0.28 | 0.20 | 0.10 | 0.06 | 0.60 | 0.31 | 0.06 | 0.58 |
| Beef Salami (Bellat) | 3.70 | 0.30 | 0.09 | 0.90 | 0.22 | 0.02 | 0.00 | 0.00 | 12.49 |
| Pâté Pizza Flavored (Bellat) | 3.39 | 0.28 | 0.10 | 2.48 | 0.15 | 0.03 | 0.00 | 0.00 | 6.90 |
| Chicken Liver Pâté (Bellat) | 2.13 | 0.14 | 0.06 | 3.89 | 0.14 | 0.06 | 0.00 | 0.00 | 3.80 |
| Beef Corned (Bellat) | 2.14 | 1.34 | 0.05 | 0.80 | 0.23 | 0.00 | 0.00 | 0.00 | 7.85 |
| Cheese Cheddar (Chebli) | 4.02 | 0.33 | 0.21 | 1.05 | 0.25 | 0.01 | 0.00 | 0.00 | 6.22 |
